# Supplementary material for: Spatiotemporal patterning of photoresponsive DNA-based hydrogels to tune local cell responses
Source: PubMed Central journal article supplement (PMC8062675; doi:10.1038/s41467-021-22645-8), 2021-04-22
Supplement: 41467_2021_22645_MOESM1_ESM.pdf [file 41467_2021_22645_MOESM1_ESM.pdf]

## **Supporting Information**

Spatiotemporal patterning of photoresponsive DNA-based hydrogels to tune local cell responses

Fujian Huang<sup>1</sup>, Mengxi Chen<sup>1</sup>, Zhixin Zhou<sup>2</sup>, Ruilin Duan<sup>1</sup>, Fan Xia<sup>1</sup> and Itamar Willner<sup>2</sup>

<sup>1</sup> State Key Laboratory of Biogeology and Environmental Geology, Engineering Research Center of Nano-Geomaterials of Ministry of Education, Faculty of Materials Science and Chemistry, China University of Geosciences, Wuhan 430074, China

<sup>2</sup> Institute of Chemistry, Center for Nanoscience and Nanotechnology, The Hebrew University of Jerusalem, Jerusalem 91904, Israel

Correspondence should be addressed to F.H. (email: [huangfj@cug.edu.cn](mailto:huangfj@cug.edu.cn)), F.X. (email: [xiafan@hust.edu.cn](mailto:xiafan@hust.edu.cn)) and I.W. (email: [itamar.willner@mail.huji.ac.il](mailto:itamar.willner@mail.huji.ac.il)).

## 1. Supplementary Tables

**Supplementary Table 1.** Self-complementary DNA sequences (photocleavable or not) used as crosslinker in hydrogel formation process.

| Name | Sequence (5'→3')                |
|------|---------------------------------|
| 1    | Acrydite-AATGCTCGCGCGAGCA       |
| 4    | Acrydite-AA//PC//TGCTCGCGCGAGCA |

**Supplementary Table 2.** Photocleavable single-strand DNA and FAM modified complementary strand.

| Name | Sequence (5'→3')                              |
|------|-----------------------------------------------|
| 2    | Acrydite-TTTTT//PC//GGCTATAGCACATGGGTAAAACGAC |
| 2'   | FAM-GTCGTTTTACCCATGTGCTATAGCC                 |

**Supplementary Table 3.** Photoactivatable hairpin structured DNA, TAMRA modified invading DNA strand and TAMRA modified invading DNA strand with MUC-1 aptamer sequence.

| Name | Sequence (5'→3')                                                               |
|------|--------------------------------------------------------------------------------|
| 3    | Acrydite-TTTTCCGGAATTCCGCTTCTAGTT//PC//GCGGAATTCCGGAAAA                        |
| 3'   | TAMRA-AACTAGAAGCGGAATTCCGGAAAA                                                 |
| 3''  | TAMRA- <u>G</u> CAGTTGATCCTTTGGATACCCTGGTTTTTTTTTTAACTAGAAGCG<br>GAATTCCGGAAAA |

**Note:** Underlined is the sequence of MUC-1 aptamer.

**Supplementary Table 4.** DNA sequences used in the site-specific swelling process of patterned hydrogels for hydrogel pattern regulation.

| Name | Sequence (5'→3')                                           |
|------|------------------------------------------------------------|
| 5    | Acrydite-TAAGTTCGCTGTGGCACCTGCACG                          |
| 5'   | Acrydite-GTACAA//PC//CGTGCAGGTGCCACAGCGTGGATC              |
| H1   | GATCCGCGCTGTGGCACCTGCACGCACCCACGTGCAGGTGCCACAGCGAA<br>CTTA |
| H2   | TGGGTGCGTGCAGGTGCCACAGCGTAAGTTCGCTGTGGCACCTGCACGTTG<br>TAC |

## 2. Supplementary Figures

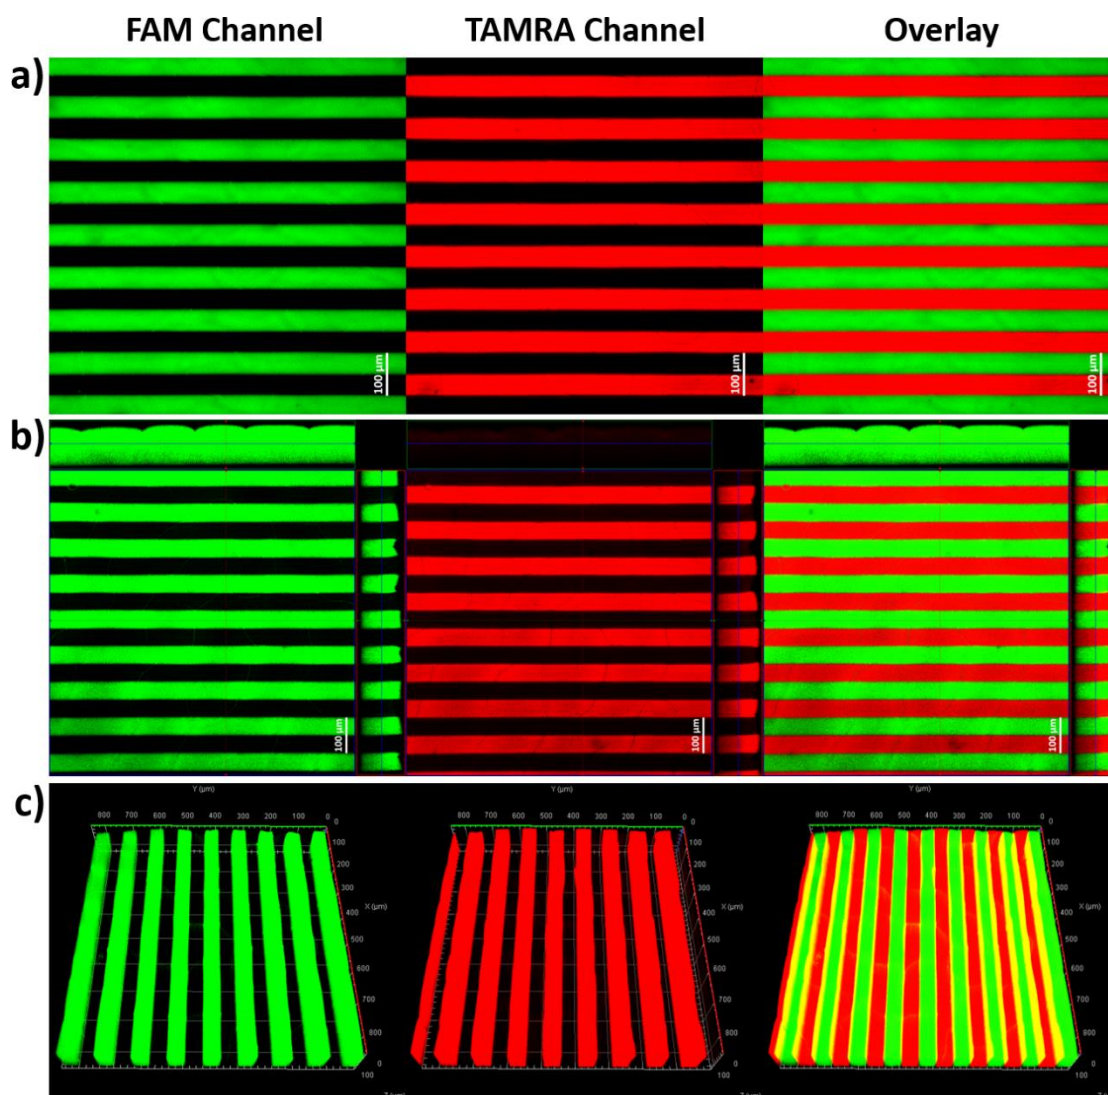

**Supplementary Figure 1.** Light-induced orthogonal patterning of a hydrogel exhibiting dual functionalities. The polyacrylamide (1)-crosslinked hydrogel is functionalized with the *o*-nitrobenzylphosphate ester nucleic acids (2) and (3). Exposure of the hydrogel to light yield in the illuminated domains the activated strand (3) and retain in the non-irradiated domains the free nucleic acid strand (2). The dual patterned function allows the selective association of (3′)-TAMRA and (2′)-FAM to the respective domains. Confocal fluorescence images **a**), orthogonal view **b**), and three-dimensional fluorescence imaging reconstruction **c**) of the dual functional DNA strand patterned hydrogel film by using stripe-like pattern containing photomask. Scale bars are 100 μm. N = 4 independent experiments were performed.

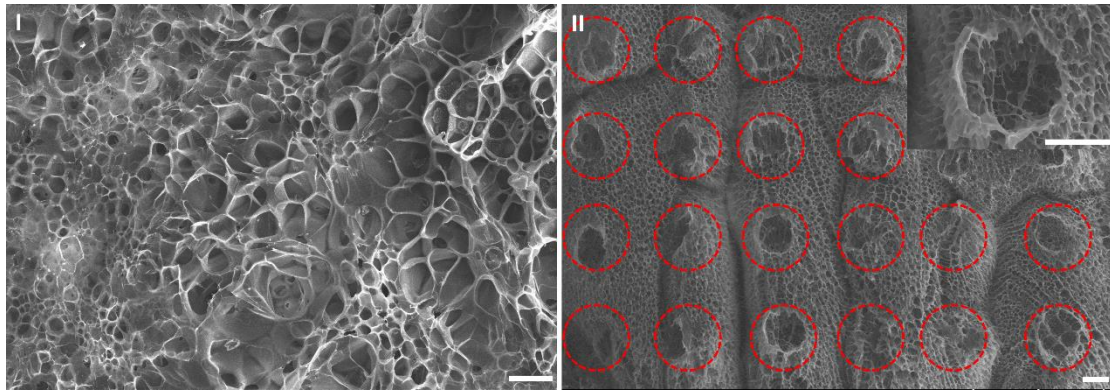

**Supplementary Figure 2.** SEM image of: Panel I– The parent hydrogel shown in Figure 5a prior to the photopatterning. Panel II– The hydrogel film after photopatterning,  $\lambda = 365$  nm, according to Figure 5a. Scale bars correspond to 20  $\mu\text{m}$ . N = 4 independent experiments were performed.

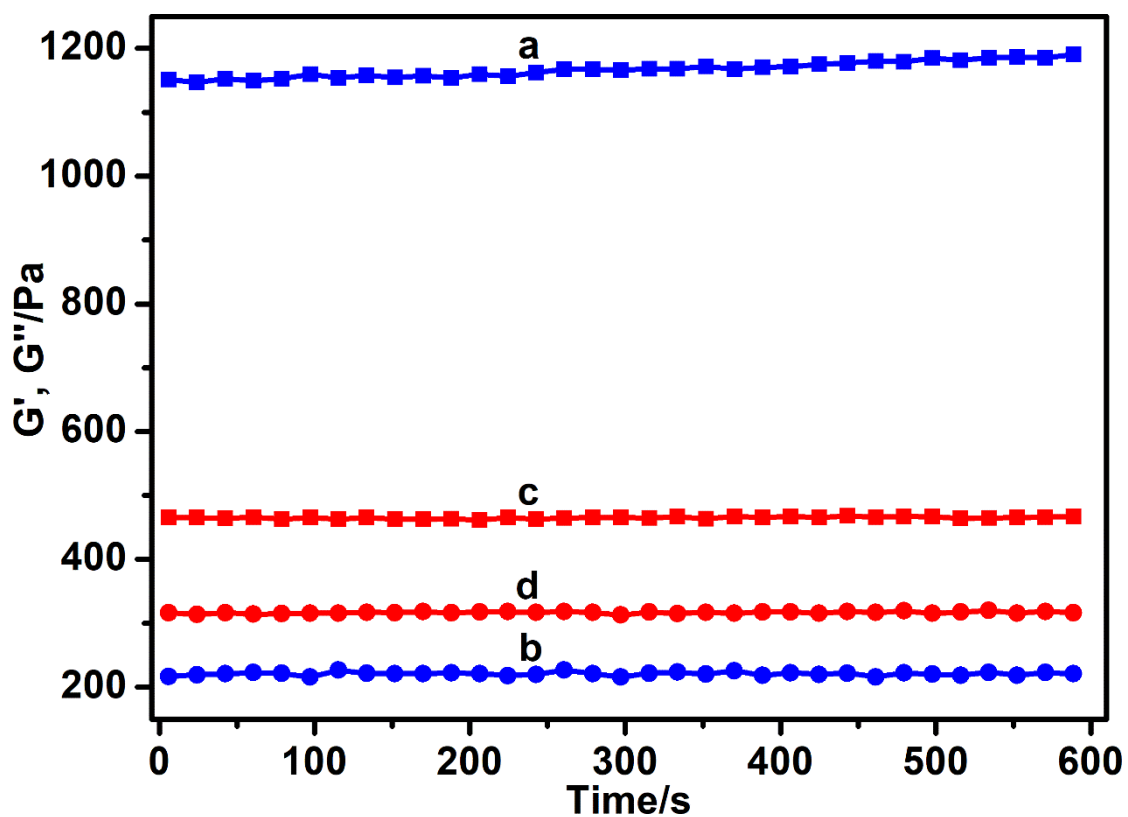

**Supplementary Figure 3.** Time-dependent sweep rheological measurements of hydrogels crosslinked with photocleavable crosslinker DNA strands (4) without UV irradiation and with 5 min UV irradiation. Curves a and b corresponding to the storage modulus  $G'$  and loss modulus  $G''$  before UV irradiation. Curves c and d corresponding to the storage modulus  $G'$  and loss modulus  $G''$  after 5 min UV irradiation.

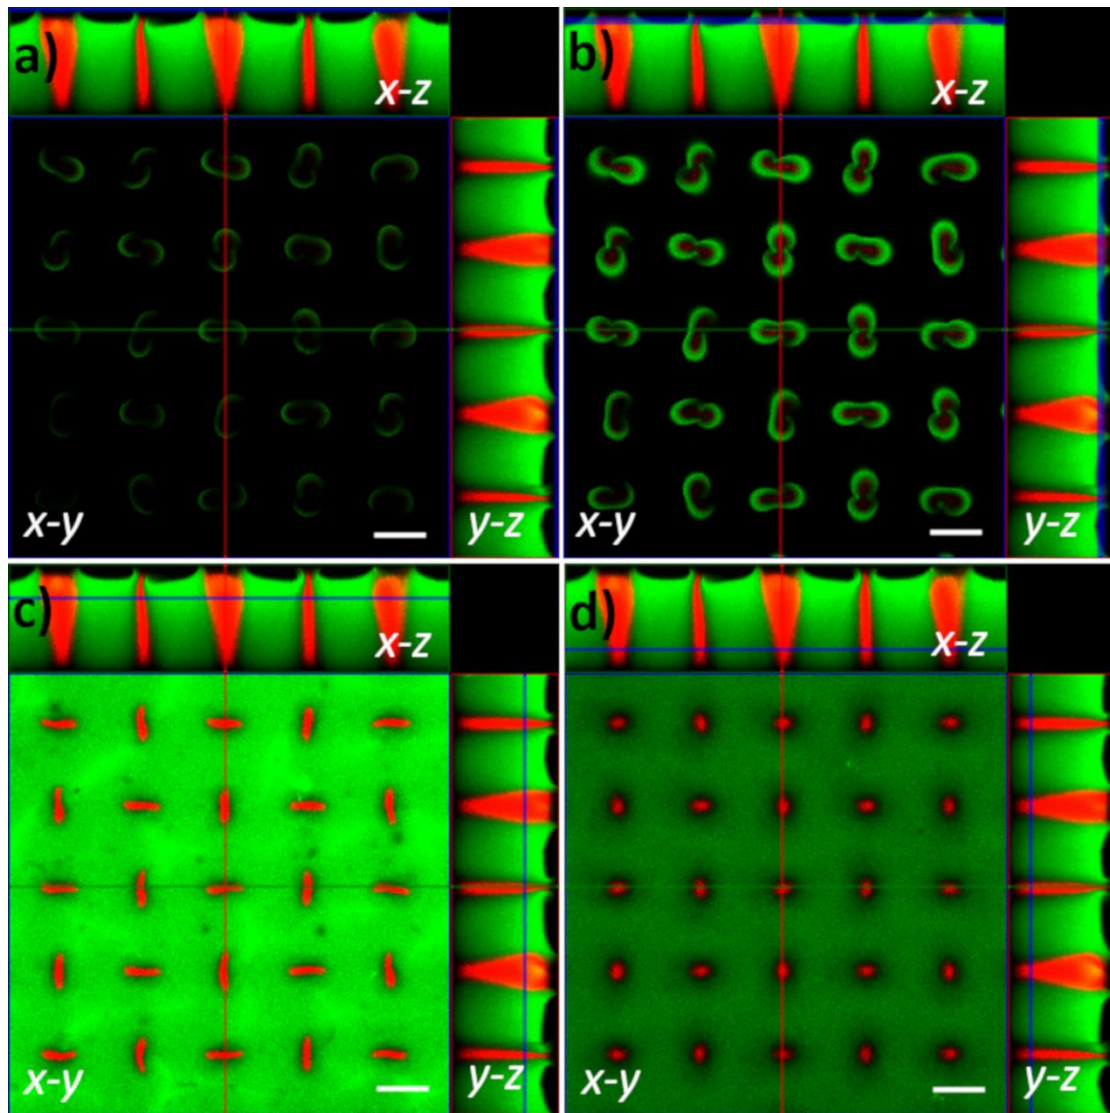

**Supplementary Figure 4.** Orthogonal views of the patterned DNA based hydrogels after DNA-directed HCR-induced programmable expansion. **a)→d)** show different Z position imaging from top surface of the hydrogel to the bottom surface of the hydrogels. Scale bars, 50  $\mu\text{m}$ . N = 4 independent experiments were performed.



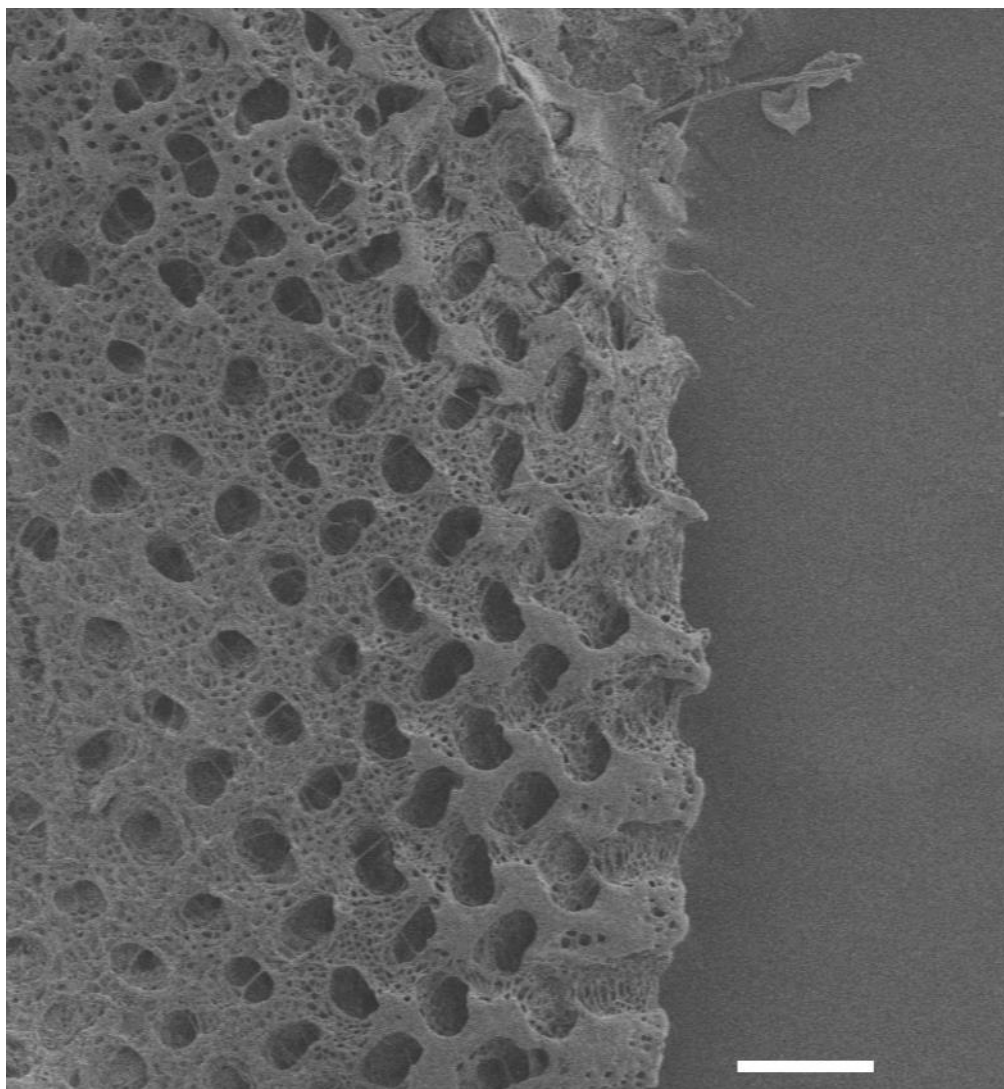

**Supplementary Figure 5.** SEM image of patterned hydrogels after HCR process with orthogonally arranged ellipsoid shapes. Scar bar is 100 nm. N = 4 independent experiments were performed.

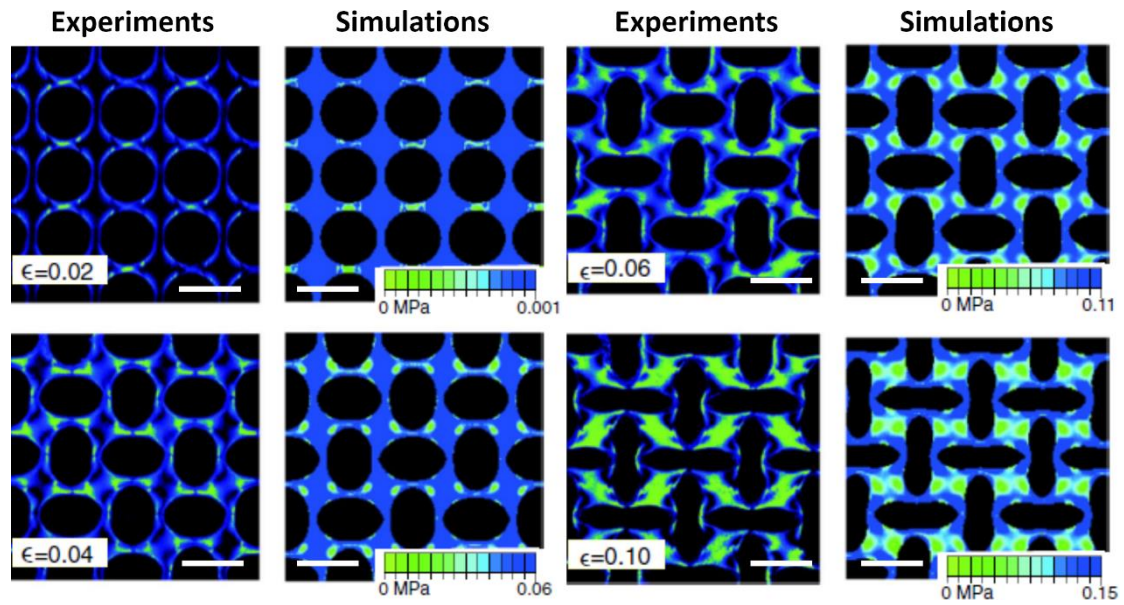

**Supplementary Figure 6.** Experimental (left) and numerical (right) images of the square lattice at different levels of macroscopic strain: 2%, 4%, 6%, and 10%. The experimental samples were viewed through cross polars and the colors give a qualitative indicator of the regions of localized stress which provide a useful comparison with the calculated principal stress levels. Scale bars correspond to 1 cm. Reproduced with permission from Ref. [1]. Copyright 2007 American Physical Society.



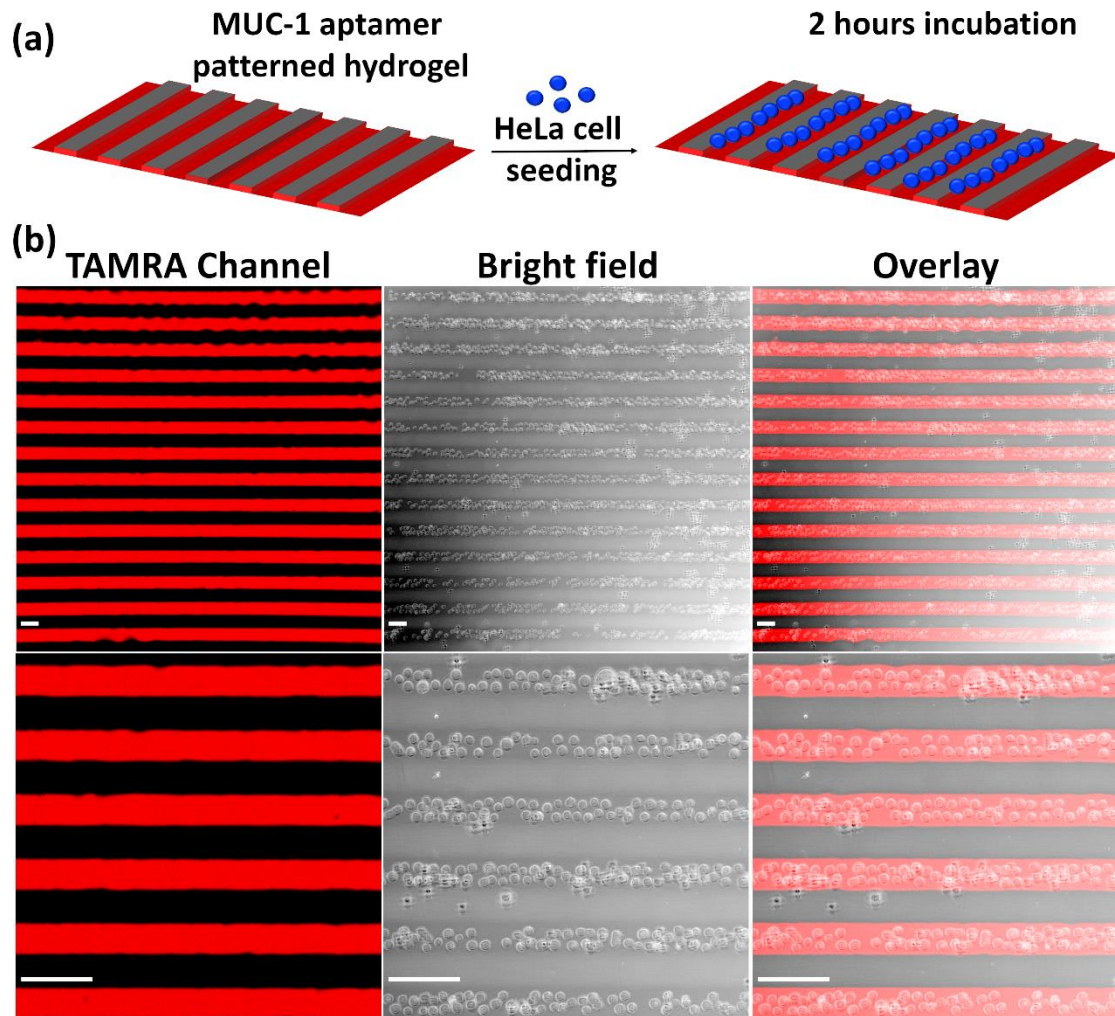

**Supplementary Figure 7.** (a) The patterned population-level control of HeLa cells binding in confined MUC-1 aptamer modified domains is achieved through 2D culture of cells on MUC-1 aptamer patterned hydrogel. (b) Fluorescent, brightfield, and overlay images highlight the cells adsorbed onto the confined MUC-1 aptamer patterned strip-like domains. N = 3 independent experiments were performed.

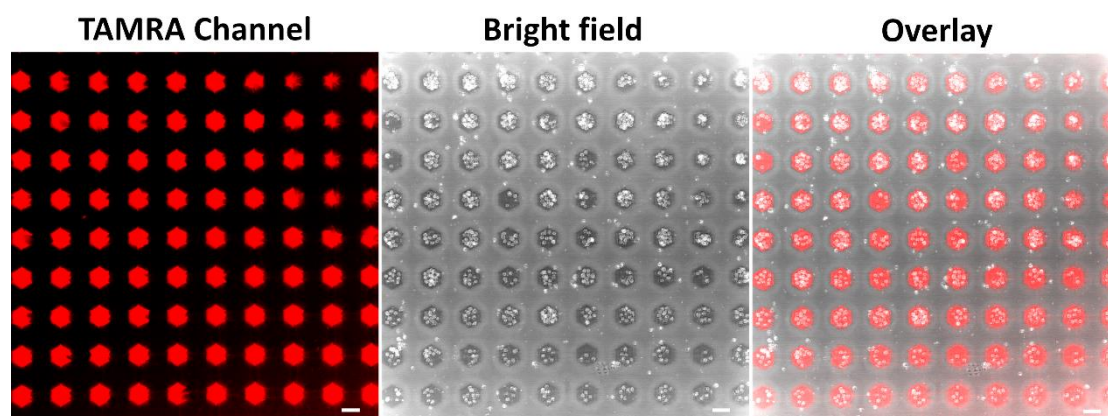

**Supplementary Figure 8.** Fluorescent, brightfield, and overlay images highlight the cells selectively adsorbed onto the confined MUC-1 aptamer patterned hexagon domains. N = 3 independent experiments were performed.

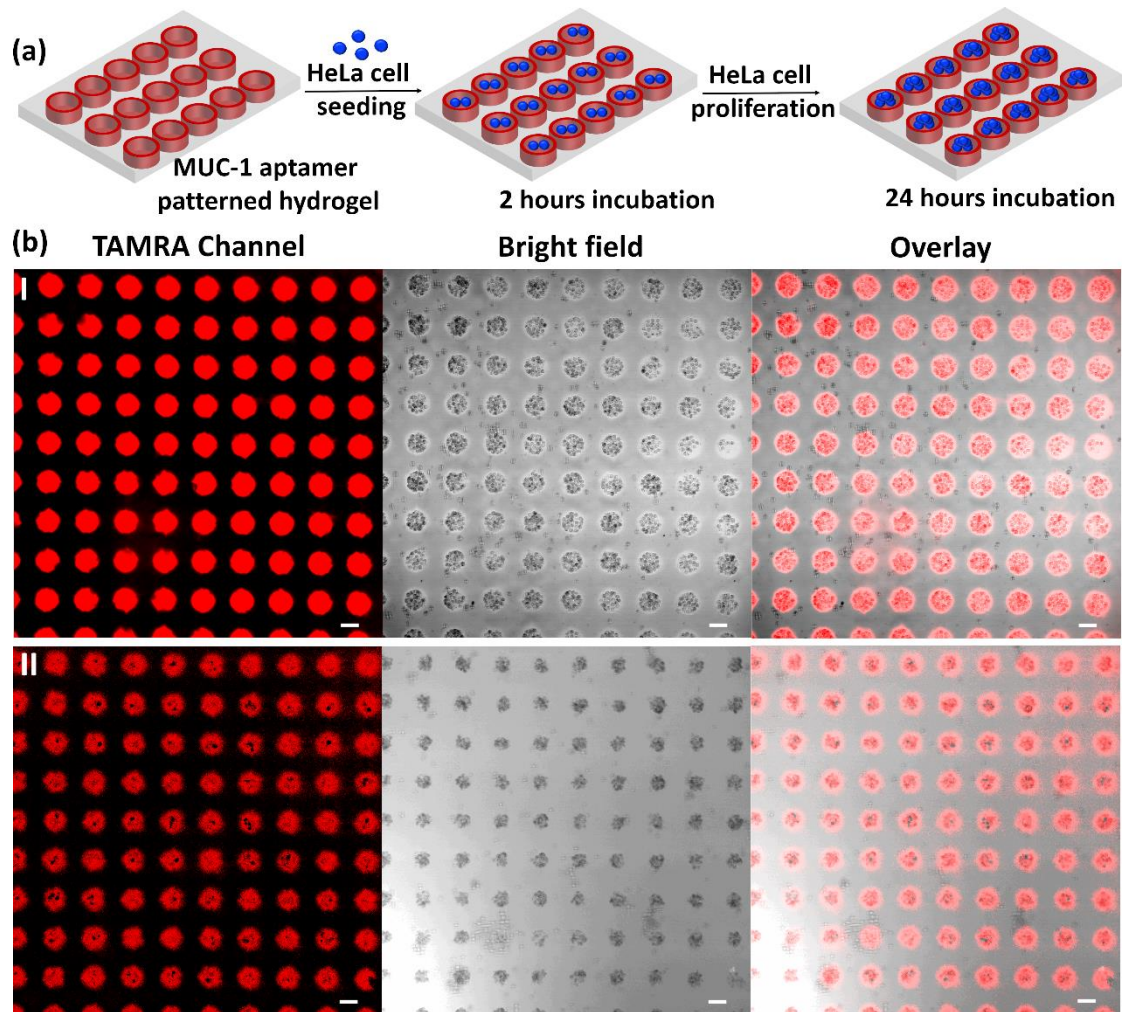

**Supplementary Figure 9.** (a) The patterned population-level control of HeLa cells binding and proliferation within confined MUC-1 aptamer modified domains is achieved through 2D culture of cells on MUC-1 aptamer patterned hydrogel. (b) Fluorescent, brightfield, and overlay images highlight the cells binding and proliferation within the confined MUC-1 aptamer patterned circular domains with 2 hours incubation (panel I) and 24 hours incubation (panel II). Scale bars are 50  $\mu\text{m}$ . N = 3 independent experiments were performed.

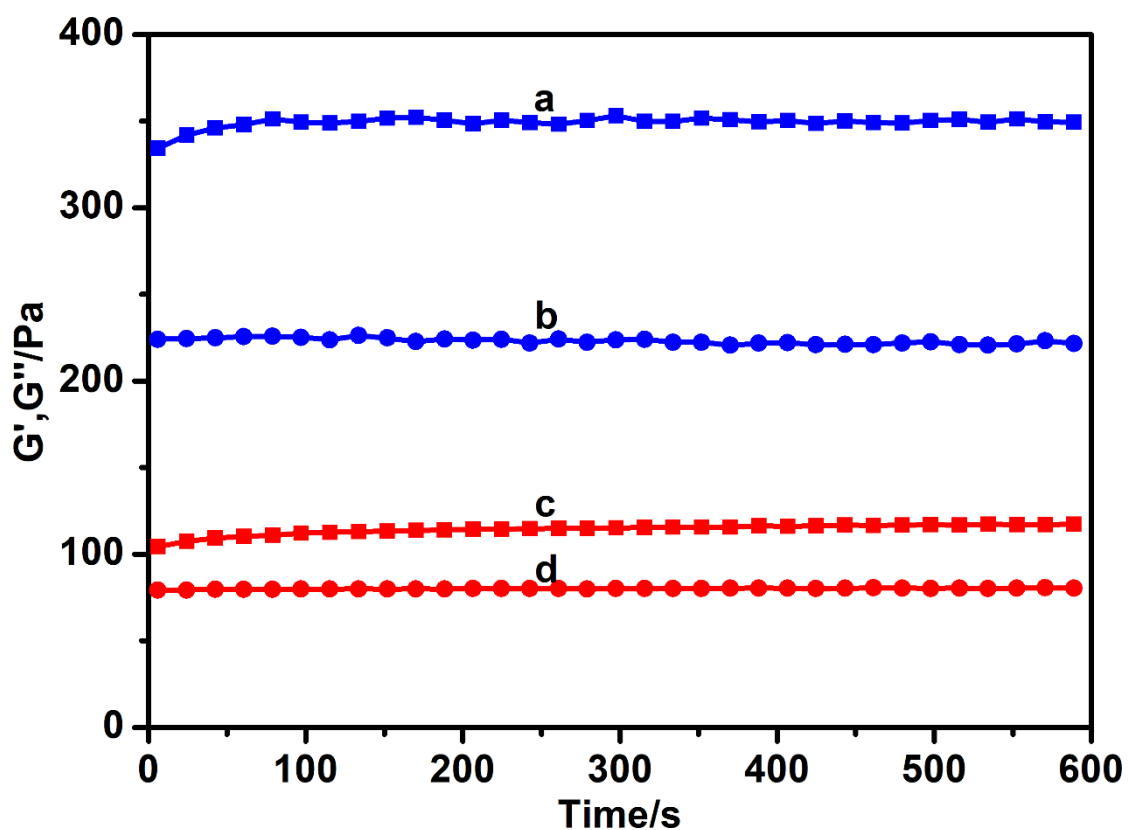

**Supplementary Figure 10.** Time-dependent sweep rheological measurements of hydrogels crosslinked with photocleavable crosslinker DNA strands (4) with 5 min UV irradiation before cell culture and after cell culture. Curves a and b corresponding to the storage modulus  $G'$  and loss modulus  $G''$  before cell culture. Curves c and d corresponding to the storage modulus  $G'$  and loss modulus  $G''$  after 24 h cell culture.



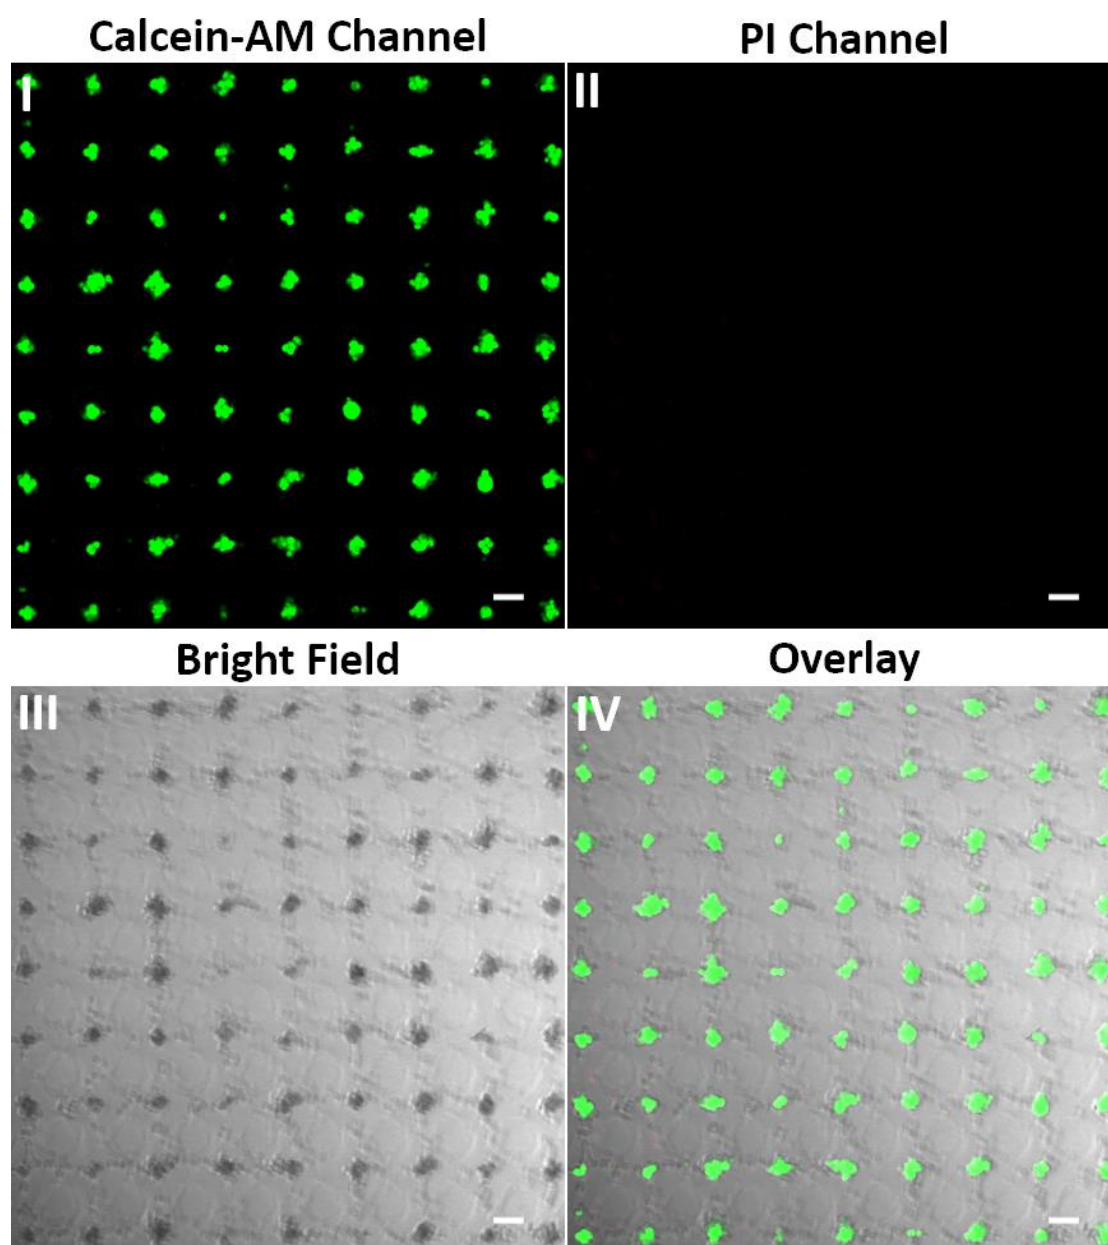

**Supplementary Figure 11.** Confocal fluorescence images of proliferated HeLa cells on patterned hydrogel surface. HeLa cells were cultured for 24 hours and then stained with calcein-AM and PI to verify the viability of the cells. Panel I– Fluorescence microscopy image (Calcein-AM channel) of the calcein-AM stained living HeLa cells proliferated in the patterned domains. Panel II– Fluorescence microscopy image (PI channel) of the PI-stained dead HeLa cells in the patterned domains. Panel III–Bright field image of the HeLa cells linked to the confined circular domains modified with MUC-1 aptamer. Panel IV– Overlay of panel I, panel II, and panel III. Scale bars are 50  $\mu\text{m}$ . N = 3 independent experiments were performed.

**Reference:**

[1] Mullin, T., Deschanel, S., Bertoldi, K., Boyce, M. C. Pattern transformation triggered by deformation, *Physical Review Letters*, 2007, 99, 084301.
