# Supplementary material for: Spatiotemporal patterning of photoresponsive DNA-based hydrogels to tune local cell responses
Source: PubMed Central journal article supplement (PMC8062675; doi:10.1038/s41467-021-22645-8), 2021-04-22
Supplement: 41467_2021_22645_MOESM3_ESM.pdf [file 41467_2021_22645_MOESM3_ESM.pdf]

## Description of Additional Supplementary Files

Title: Supplementary Movie 1.

Description: Video of the computerized reconstructed 3D patterned hydrogel in Figure 2c.

Title: Supplementary Movie 2.

Description: Video corresponding to the reconstructed 3D patterned hydrogel in Figure 3c.

Title: Supplementary Movie 3.

Description: Visualization of the optical profiling of the reconstructed 3D patterned hydrogel in Figure 5c.
